# Supplementary material
Source: PubMed Central journal article supplement (PMC4765162)
Supplement: JSLHR-58-1306-s001.pdf [file JSLHR-58-1306-s001.pdf]

**Supplemental Material. Meta-Analysis Codesheet**

**Study Information**

Study ID: \_\_\_\_\_  
Coder: \_\_\_\_\_  
Author(s): \_\_\_\_\_  
Year: \_\_\_\_\_

Study Design: \_\_\_\_\_

- (1) Cross-sectional
- (2) Longitudinal

**Participant Information**

Total Number of Participants: \_\_\_\_\_ p. \_\_\_\_\_

Race/Ethnicity: p. \_\_\_\_\_

Enter Number or Percent:

- \_\_\_\_\_ African American/Black
- \_\_\_\_\_ Caucasian/White (inferred)
- \_\_\_\_\_ Latino/Hispanic (any race) (inferred)
- \_\_\_\_\_ Multi-racial (inferred)
- \_\_\_\_\_ Other
- \_\_\_\_\_ Not Reported or Unknown

SES: p. \_\_\_\_\_

Enter Number or Percent:

\_\_\_\_\_ lower

SES Index: \_\_\_\_\_ p. \_\_\_\_\_

- (1) FARL
- (2) Hollingshead Index or Barret
- (3) Survey Information
- (4) Multiple
- (5) Other (Describe) or Additional Info:

---

---

Participant Type: \_\_\_\_\_ p. \_\_\_\_\_

- (1) typically developing
- (2) students at-risk for reading difficulties
- (3) students with reading difficulties
- (4) students with a learning or reading disability
- (5) mixed/multiple:

---

(6) Not reported or unknown

If at risk, how was this determined: \_\_\_\_\_ p. \_\_\_\_\_

- (1) low income
- (2) low phonemic awareness
- (3) language disorder
- (4) Other (Describe) or Additional Info:

---

---

Gender (*n*): p. \_\_\_\_\_

\_\_\_\_\_ Males  
\_\_\_\_\_ Females

Grade (and/or Age) of Participants (*n*): p. \_\_\_\_\_

\_\_\_\_\_ Kindergarten      \_\_\_\_\_ First Grade      \_\_\_\_\_ Second Grade      \_\_\_\_\_ Third Grade  
\_\_\_\_\_ Fourth Grade      \_\_\_\_\_ Fifth Grade      \_\_\_\_\_ Sixth Grade

Additional Info:

**Dialect**

Classification: \_\_\_\_\_

- (1) African American English (AAE) or African American Vernacular English
- (2) Southern American English (SoAE)
- (3) Nonmainstream American English (NMAE; non-specific)
- (4) Multiple:

---

(5) Other:

---

Type: \_\_\_\_\_

- (1) oral
- (2) written
- (3) both

How was dialect sample collected; measure(s), software programs used: p. \_\_\_\_\_

---

---

Reliability reported?: \_\_\_\_\_

- (1) Yes
- (2) No

If yes, type: \_\_\_\_\_  
Coefficient: \_\_\_\_\_

Dialect Measure: \_\_\_\_\_ p. \_\_\_\_\_

- (1) Listener Judgement
- (2) Type-based method
- (3) Token-based method (i.e., Dialect Density Measure [DDM])
- (4) Diagnostic Evaluation of Language Variation (DELV)
- (5) Multiple:

(6) Other:

---

---

If DDM was used, which method: \_\_\_\_\_ p. \_\_\_\_\_

- (1) Number of utterances containing token produced/total number of utterances
  - (2) Tokens produced/total number of words
  - (3) Tokens produced/total number of utterances
  - (4) Multiple
  - (5) Other:
- 
- 

Dialect Features Analyzed: \_\_\_\_\_ p. \_\_\_\_\_

- (1) Morphosyntactic (Grammatical)
- (2) Phonological
- (3) Combined
- (4) Multiple:

(5) Selected Features (Describe) or Additional Info:

---

---

Dialect Groups Defined:

G1 = \_\_\_\_\_

G2 = \_\_\_\_\_

**Literacy Outcomes**

Outcome Measures:

| ES# | Measure Type | Measure | Reliability Coefficient | Type |
|-----|--------------|---------|-------------------------|------|
|     |              |         |                         |      |
|     |              |         |                         |      |
|     |              |         |                         |      |
|     |              |         |                         |      |
|     |              |         |                         |      |

Dialect/Literacy bivariate correlations/relationships reported

| predictor | (ES #) outcome | sample/Group | correlation | <i>p</i> value | <i>n</i> |
|-----------|----------------|--------------|-------------|----------------|----------|
|           |                |              |             |                |          |
|           |                |              |             |                |          |
|           |                |              |             |                |          |
|           |                |              |             |                |          |
|           |                |              |             |                |          |

Outcomes for Groups

| ES # | <i>p.</i> | Group # | M | SD | <i>n</i> | Group # | M | SD | <i>n</i> | Comp. Code | ES, F, t, Z, or X <sup>2</sup> , <i>p</i> value |
|------|-----------|---------|---|----|----------|---------|---|----|----------|------------|-------------------------------------------------|
|      |           |         |   |    |          |         |   |    |          |            |                                                 |
|      |           |         |   |    |          |         |   |    |          |            |                                                 |
|      |           |         |   |    |          |         |   |    |          |            |                                                 |
|      |           |         |   |    |          |         |   |    |          |            |                                                 |
|      |           |         |   |    |          |         |   |    |          |            |                                                 |

Does the study include multiple outcome measures? \_\_\_\_\_

- (1) Yes
- (2) No

If yes, are correlations among measures reported? \_\_\_\_\_

- (1) Yes      *p.* \_\_\_\_\_
- (2) No
